# Supplementary material
Source: MDPI journal article supplement (https://www.mdpi.com/2306-5729/8/1/16)
Supplement: s1 [file s1 › data-2070283-supplementary.pdf]

# Supplementary Materials

## *Traffic Sign Detection and Classification on the Austrian Highway Traffic Sign Data Set*

### 1 Schema of Metadata Tables

| Column                 | Type     | Description                                                                                                                                                        |
|------------------------|----------|--------------------------------------------------------------------------------------------------------------------------------------------------------------------|
| image_id               | Integer  | Identifier of scene image containing the annotation; equals file name of corresponding JPEG file                                                                   |
| annotation_id          | Integer  | Unique identifier of each annotation; linked to column <b>id</b> in metadata table of ATSD-Signs (Table 2)                                                         |
| xtl                    | Float    | x-coordinate of top-left corner of bounding box, in pixels                                                                                                         |
| ytl                    | Float    | y-coordinate of top-left corner of bounding box, in pixels                                                                                                         |
| xbr                    | Float    | x-coordinate of bottom-right corner of bounding box, in pixels                                                                                                     |
| ybr                    | Float    | y-coordinate of bottom-right corner of bounding box, in pixels                                                                                                     |
| group_id               | Integer  | Identifier for grouping signs; rows with same non-negative group_id semantically belong together, e. g., as main sign and additional panel                         |
| type                   | Category | Type (material) of annotated traffic sign; one of ‘plate’, ‘led’, ‘prismatic’, ‘backlit’                                                                           |
| not_normal_to_roadway  | Bool     | Whether traffic sign is not oriented normal to roadway; cf. Figure 6a in main text                                                                                 |
| unusual_sign           | Bool     | Whether traffic sign is in some sense ‘unusual’; cf. Figure 6j in main text                                                                                        |
| crossed_out            | Bool     | Whether traffic sign is crossed out; cf. Figure 6c in main text                                                                                                    |
| weather                | Category | Weather conditions when image was acquired; either ‘normal’ or ‘rain’                                                                                              |
| lighting               | Category | Lighting conditions under which image was acquired; one of ‘normal’, ‘underexposed’, ‘overexposed’, ‘shades’                                                       |
| fog                    | Bool     | Whether there was fog when image was acquired; cf. Figure 6e in main text                                                                                          |
| tunnel                 | Bool     | Whether image was acquired in a tunnel; cf. Figure 6f in main text                                                                                                 |
| damaged                | Bool     | Whether traffic sign is damaged; cf. Figure 6g in main text                                                                                                        |
| trimmed                | Bool     | Whether traffic sign is not visible entirely on scene image; cf. Figure 6h in main text                                                                            |
| covered                | Bool     | Whether traffic sign is partly occluded, e. g., by vehicles or plants; cf. Figure 6i in main text                                                                  |
| multiple_signs_visible | Bool     | Whether multiple signs are visible in annotated bounding box; cf. Figure 6b in main text                                                                           |
| caption                | Bool     | Whether image caption is visible in annotated bounding box; cf. Figure 6k in main text                                                                             |
| class_id               | String   | Identifier of class annotated traffic sign belongs to; two-digit category identifier followed by ‘_’ followed by two-digit class identifier; same as in ATSD-Signs |

Supplementary Table S1: Schema of ATSD-Scenes metadata tables (‘meta\_train.csv’, ‘meta\_test.csv’). Rows correspond to individual traffic sign annotations in traffic scene images.

| Column                | Type     | Description                                                                                          |
|-----------------------|----------|------------------------------------------------------------------------------------------------------|
| id                    | Integer  | Unique identifier of each patch; equals file name of corresponding JPEG file                         |
| type                  | Category | Type (material) of traffic sign visible on each patch; one of 'plate', 'led', 'prismatic', 'backlit' |
| not_normal_to_roadway | Bool     | Whether traffic sign is not oriented normal to roadway; cf. Figure 6a in main text                   |
| fog                   | Bool     | Whether there was fog when image was acquired; cf. Figure 6e in main text                            |
| tunnel                | Bool     | Whether image was acquired in a tunnel; cf. Figure 6f in main text                                   |
| damaged               | Bool     | Whether traffic sign is damaged; cf. Figure 6g in main text                                          |
| trimmed               | Bool     | Whether traffic sign is not visible entirely on the patch; cf. Figure 6h in main text                |
| covered               | Bool     | Whether traffic sign is partly occluded, e. g., by vehicles or plants; cf. Figure 6i in main text    |
| rain                  | Bool     | Whether it was raining when image was acquired; cf. Figure 6d in main text                           |
| overexposed           | Bool     | Whether image is overexposed                                                                         |
| underexposed          | Bool     | Whether image is underexposed                                                                        |
| shades                | Bool     | Whether shadow is cast on parts of traffic sign                                                      |

Supplementary Table S2: Schema of ATSD-Signs metadata tables ('meta\_train.csv', 'meta\_test.csv'). Rows correspond to individual traffic sign patches.

## 2 Details on Baseline Traffic Sign Recognition Models

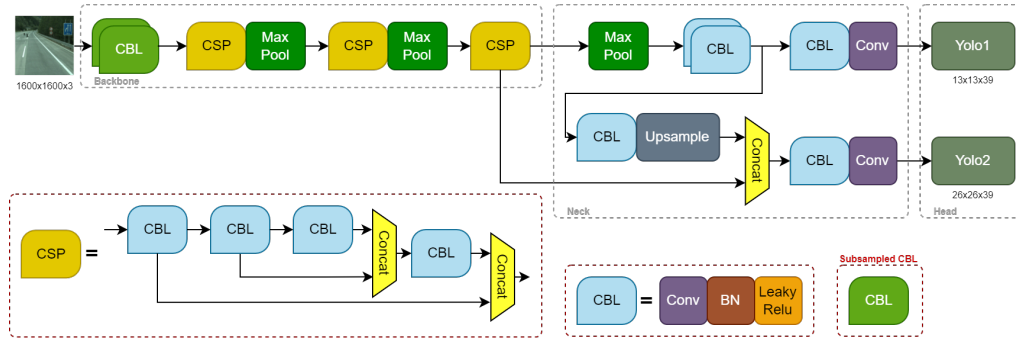

Supplementary Figure S1: Architecture of the YOLOv4-tiny detection model. This is a one-stage detector consisting of three main parts: backbone, neck and head. The feature formation is done by the backbone using CSPDarknet53-tiny. The neck mixes and aggregates the features formed in the backbone using a feature pyramid network, which aggregates parameters from different backbone scales to a single feature map. The YOLO head uses this feature map to locate the bounding boxes and classify the detected objects.

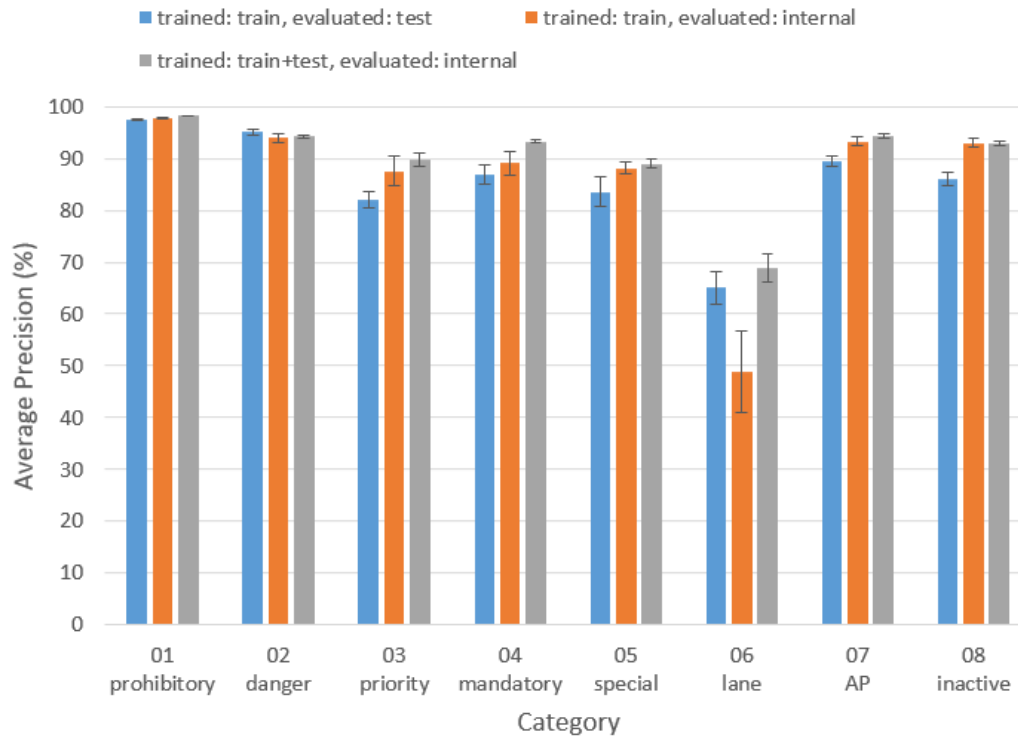

Supplementary Figure S2: Average precision of each category including the standard deviation averaging three independent models. Category 'lane' scores the lowest average precision among all categories, which may be caused by the small number of samples in the data set. In contrast, 'prohibitory' achieves an average precision of up to 98.20%.

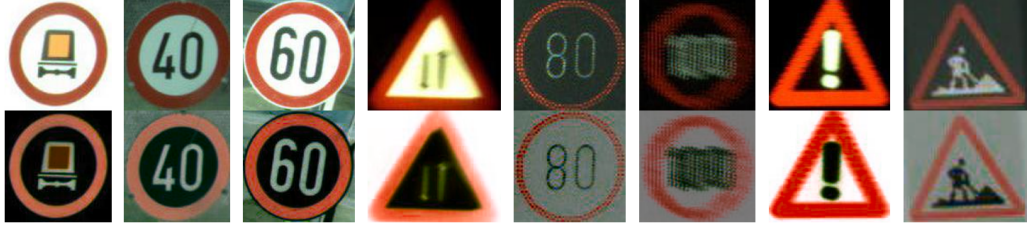

Supplementary Figure S3: Exemplary results of our LED augmentation. Top: original image; bottom: transformed image (non-LED → LED, and vice versa).

| Augmentation  | Test Set     |                   | Internal Set |                   |
|---------------|--------------|-------------------|--------------|-------------------|
|               | accuracy (%) | balanced acc. (%) | accuracy (%) | balanced acc. (%) |
| none          | 97.15±0.19   | 94.97±0.69        | 96.63±0.11   | 94.38±0.51        |
| geometric     | 97.39±0.40   | 95.28±0.59        | 96.90±0.48   | 94.18±0.64        |
| geometric+LED | 97.61±0.24   | 95.75±0.53        | 97.20±0.21   | 94.94±0.06        |
| none          |              |                   | 97.82±0.07   | 96.02±0.18        |
| geometric     |              |                   | 98.18±0.11   | 97.14±0.20        |
| geometric+LED |              |                   | 98.27±0.25   | 97.65±0.28        |

Supplementary Table S3: Classification results on the public test set and the internal set, averaged over three independent runs (models trained with same hyperparameters but different random seeds). Accuracy (Acc.) and balanced accuracy (BAcc.) are displayed as *mean*±*SD*. Rows without results on the test set refer to models trained on all public data, including both training- and test set.

| Augmentation  | Test Set mAP (%) |            | Internal Set mAP (%) |            |
|---------------|------------------|------------|----------------------|------------|
|               | keep             | suppress   | keep                 | suppress   |
| none          | 87.74±2.29       | 87.40±1.87 | 89.03±2.34           | 89.49±2.24 |
| geometric     | 87.56±2.28       | 87.43±1.69 | 89.04±2.10           | 89.47±2.04 |
| geometric+LED | 87.87±2.29       | 87.74±1.71 | 89.30±2.22           | 90.07±1.96 |
| none          |                  |            | 91.68±0.67           | 91.97±0.71 |
| geometric     |                  |            | 91.69±0.72           | 92.01±0.71 |
| geometric+LED |                  |            | 91.99±0.66           | 92.46±0.68 |

Supplementary Table S4: Results of the full detection- and classification pipeline on the public test set and the internal set, averaged over nine independent runs (three detectors combined with three classifiers in round-robin fashion). Mean average precision (mAP) is displayed as *mean*±*SD*. Rows without results on the test set refer to models trained on all public data, including both training- and test set. ‘suppress’ means that detections with disagreement between detector and classifier were discarded, ‘keep’ means that disagreements were not taken into account.

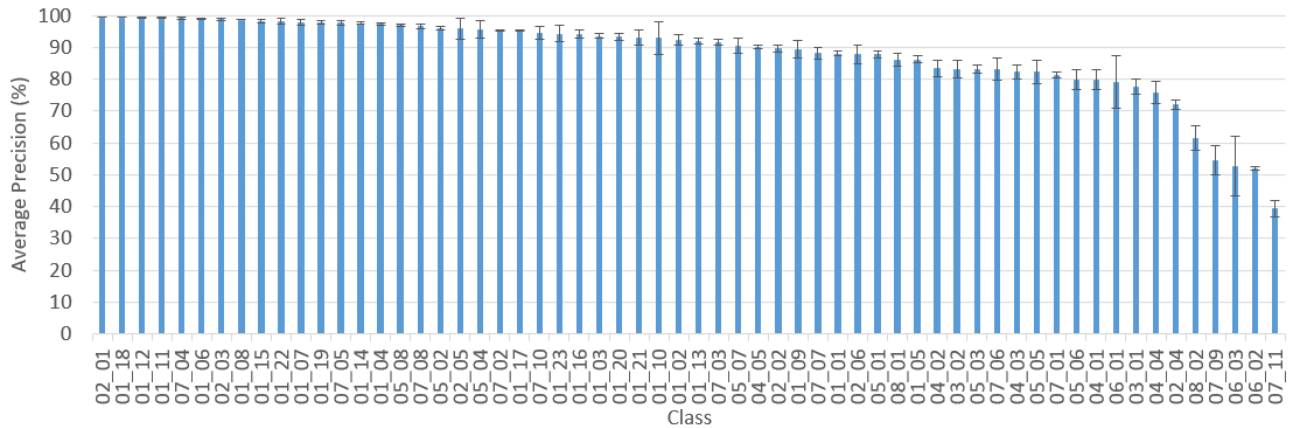

Supplementary Figure S4: Average precision of each class, for full pipelines evaluated on the public test set without suppression of detections based on detection- and classification disagreement. Classifiers were trained with geometric and LED augmentation. The two classes that can be recognized best are ‘Wild animals crossing’ (02 01; 99.50±0.00%AP) and ‘No trucks’ (01 18; 99.50±0.00% AP), and the two classes that cause most problems are ‘Additional info: except with yellow-red rotating light’ (07 11; 39.40±5.28% AP) and ‘Lane open’ (06 02; 52.01±1.34% AP).
